# Supplementary material for: Disparities in Infant Nutrition: WIC Participation and Rates of Breastfeeding in Florida
Source: MDPI journal article supplement (doi:10.3390/ijerph20115988), 2023-05-29
Supplement: s1 [file s1]

Table S1 Supplement reports the ratios of breastfeeding rates of WIC participants relative to breastfeeding rates of non-WIC participants by race/ethnicity, and education level. Here we show that black Hispanic, black non-Hispanic, and white non-Hispanic mothers with less than a high school education (low) are more likely to breastfeed when they are WIC participants. There was no effect of WIC on breastfeeding rates among white, non-Hispanic mothers with less than a high school education. The most dramatic difference is among black non-Hispanic mothers with less than an 8<sup>th</sup>-grade education, who were 39% more likely to breastfeed if they were in the WIC program. In the 9-12 grade education category, black Hispanic mothers and black non-Hispanic mothers were 10% and 13%, respectively, more likely to breastfeed if they were in the WIC program than those who were not. White Hispanic mothers with less than an 8<sup>th</sup>-grade education were 13% more likely to breastfeed if in WIC, but the breastfeeding rates were not significantly different in the 9-12<sup>th</sup> grade group. Table 3 also shows differences in rates of breastfeeding depending on race and ethnicity and the type of insurance used, which can be considered a proxy for socioeconomic status.

Table S1 Supplement. Prevalence Ratios for Breastfeeding by Racial/Ethnic Groups

| Prevalence Ratios for Breastfeeding |                 |                 |                  |                          |             |
|-------------------------------------|-----------------|-----------------|------------------|--------------------------|-------------|
| Race/Ethnicity                      | Education Level | Sample Size (N) | Prevalence Ratio | 95% Confidence Intervals |             |
|                                     |                 |                 |                  | Lower Limit              | Upper Limit |
| Black Hispanic                      | Low             | 21740           | 1.019            | 1.004                    | 1.034       |
|                                     | High            | 6572            | 0.979            | 0.965                    | 0.994       |
| Black non-Hispanic                  | Low             | 95744           | 0.988            | 0.977                    | 0.998       |
|                                     | High            | 24743           | 0.922            | 0.913                    | 0.931       |
| White Hispanic                      | Low             | 76518           | 0.978            | 0.973                    | 0.984       |
|                                     | High            | 36818           | 0.972            | 0.966                    | 0.978       |
| White non-Hispanic                  | Low             | 157529          | 0.890            | 0.885                    | 0.894       |
|                                     | High            | 126148          | 0.944            | 0.939                    | 0.950       |
| Other                               | Low             | 55708           | 0.995            | 0.988                    | 1.002       |
|                                     | High            | 28017           | 0.983            | 0.977                    | 0.990       |
